# Supplementary material for: Heat Shock Protein DnaJ in Pseudomonas aeruginosa Affects Biofilm Formation via Pyocyanin Production
Source: PubMed Central journal article supplement (PMC7143733; doi:10.3390/microorganisms8030395), 2020-03-12
Supplement: microorganisms-08-00395-s001.pdf [file microorganisms-08-00395-s001.pdf]

# Heat Shock Protein DnaJ in *Pseudomonas aeruginosa* Affects Biofilm Formation via Pyocyanin Production

Bo Zeng, Chong Wang, Pansong Zhang, Zisheng Guo, Lin Chen and Kangmin Duan

**Table S1.** Bacterial strains and plasmids used in this study.

| Stains                             | Relevant characteristic <sup>1</sup>                                                                                                                                                                                                                          | Source     |
|------------------------------------|---------------------------------------------------------------------------------------------------------------------------------------------------------------------------------------------------------------------------------------------------------------|------------|
| <i>Pseudomonas aeruginosa</i> PAO1 |                                                                                                                                                                                                                                                               | [1]        |
| DH10B                              | F <sup>-</sup> <i>mcrA</i> $\Delta$ ( <i>mrr-hsdRMS-mcrBC</i> ) $\phi$ 80 <i>lacZ</i> $\Delta$ M15 $\Delta$ <i>lacX74</i> <i>recA1 endA1 araD139</i> $\Delta$ ( <i>ara-leu</i> )7697 <i>galU galK</i> $\lambda$ - <i>rpsL</i> (Str <sup>R</sup> ) <i>nupG</i> | Invitrogen |
| <i>danJ</i> -M                     | PA4760 transposon mutant of PAO1; Gm <sup>R</sup>                                                                                                                                                                                                             | This study |
| <b>Plasmids</b>                    |                                                                                                                                                                                                                                                               |            |
| pMS402                             | Expression reporter plasmid carrying the promoterless <i>luxCDABE</i> gene; Kn <sup>R</sup> , Tmp <sup>R</sup>                                                                                                                                                | [2]        |
| pAK1900                            | <i>E. coli</i> - <i>P. aeruginosa</i> shuttle cloning vector carrying plac upstream of MCS; Amp <sup>R</sup> , Cb <sup>R</sup>                                                                                                                                | [3]        |
| pKD- <i>phzM</i>                   | pMS402 containing <i>phzM</i> promoter region; Kn <sup>R</sup> , Tmp <sup>R</sup>                                                                                                                                                                             | [4]        |
| pKD- <i>phzS</i>                   | pMS402 containing <i>phzS</i> promoter region; Kn <sup>R</sup> , Tmp <sup>R</sup>                                                                                                                                                                             | [4]        |
| pKD- <i>phzA1</i>                  | pMS402 containing <i>phzA1</i> promoter region; Kn <sup>R</sup> , Tmp <sup>R</sup>                                                                                                                                                                            | [4]        |
| pKD- <i>phzA2</i>                  | pMS402 containing <i>phzA2</i> promoter region; Kn <sup>R</sup> , Tmp <sup>R</sup>                                                                                                                                                                            | [4]        |
| pKD- <i>pqsA</i>                   | pMS402 containing <i>pqsA</i> promoter region; Kn <sup>R</sup> , Tmp <sup>R</sup>                                                                                                                                                                             | [5]        |
| pKD- <i>lasI</i>                   | pMS402 containing <i>lasI</i> promoter region; Kn <sup>R</sup> , Tmp <sup>R</sup>                                                                                                                                                                             | [6]        |
| pKD- <i>lasR</i>                   | pMS402 containing <i>lasR</i> promoter region; Kn <sup>R</sup> , Tmp <sup>R</sup>                                                                                                                                                                             | [6]        |
| pKD- <i>rhII</i>                   | pMS402 containing <i>rhII</i> promoter region; Kn <sup>R</sup> , Tmp <sup>R</sup>                                                                                                                                                                             | [6]        |
| pKD- <i>rhlR</i>                   | pMS402 containing <i>rhlR</i> promoter region; Kn <sup>R</sup> , Tmp <sup>R</sup>                                                                                                                                                                             | [6]        |
| pKD- <i>flhF</i>                   | pMS402 containing <i>flhF</i> promoter region; Kn <sup>R</sup> , Tmp <sup>R</sup>                                                                                                                                                                             | This study |
| pKD- <i>flhA</i>                   | pMS402 containing <i>flhA</i> promoter region; Kn <sup>R</sup> , Tmp <sup>R</sup>                                                                                                                                                                             | This study |
| pAK- <i>dnaJ</i>                   | pAK1900 with a 1.1 kb fragment of <i>dnaJ</i> between XbaI and HindIII; Amp <sup>R</sup>                                                                                                                                                                      | This study |

<sup>1</sup> Tmp<sup>R</sup>, trimethoprim resistance; Gm<sup>R</sup>, gentamicin resistance; Kn<sup>R</sup>, kanamycin resistance; Amp<sup>R</sup>, ampicillin resistance; Cb<sup>R</sup>, carbencillin resistance.

Table S2. Primers used in this study.

| Primer           | Sequence (5'-3') <sup>1</sup>        | Restriction site |
|------------------|--------------------------------------|------------------|
| PA4760 up        | AATA <u>AAGCTT</u> GCATGATCCGCCACGC  | HindIII          |
| PA4760 down      | GGCTCTAGACGGTCTGCTGAACGGC            | XbaI             |
| ARB1             | GGCCACGCGTCGACTACTACNNNNNNNNNNNGATAT |                  |
| P7-1             | CTAACAATTCGTTCAAGCCG                 |                  |
| ARB2             | GGCCACGCGTCGACTAGTAC                 |                  |
| P7-2             | GGATGCGTCTAAAAGCCTGC                 |                  |
| <i>flhF</i> up   | GCACTC <u>GAGGACA</u> AGGCTCCGAGG    | XhoI             |
| <i>flhF</i> down | ACAGGATCCGCAGCTCCACTTCCAG            | BamHI            |
| <i>flhA</i> up   | CGGTCTCGAGTAGTTGGTGATTGGCG           | XhoI             |
| <i>flhA</i> down | AATGGATCCGACCACGTAGTTGCCG            | BamHI            |

<sup>1</sup> Restriction sites are underlined.

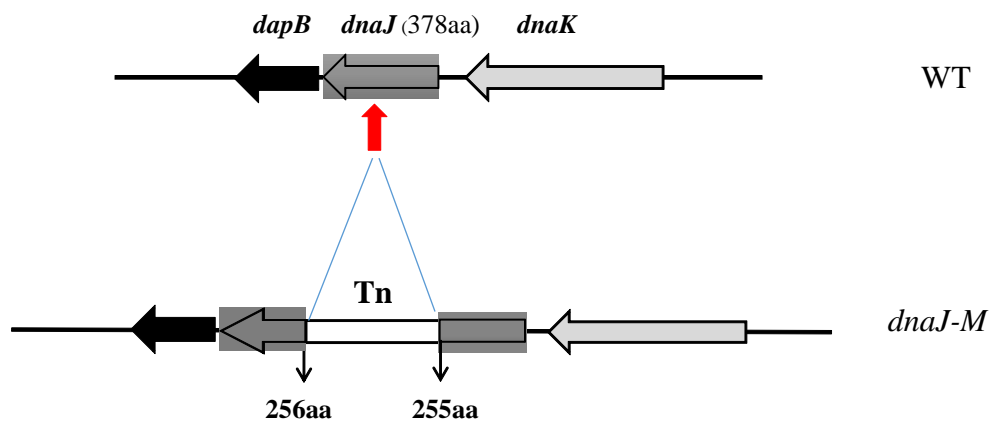

**Figure S1.** Schematic depiction of the genomic organization of *dnaJ-M*. Top: intact *dnaJ* gene on the chromosome in the wild type (WT). Bottom: *dnaJ* was disrupted by the transposon element (Tn). The insertion site is indicated with the DnaJ amino acid residues.

## References

1. Stover, C.K.; Pham, X.Q.; Erwin, A.L.; Mizoguchi, S.D.; Warrenner, P.; Hickey, M.J.; Brinkman, F.S.; Hufnagle, W.O.; Kowalik, D.J.; Lagrou, M., et al. Complete genome sequence of *Pseudomonas aeruginosa* PAO1, an opportunistic pathogen. *Nature* 2000, 406, 959-964.
2. Duan, K.; Dammel, C.; Stein, J.; Rabin, H.; Surette, M.G. Modulation of *Pseudomonas aeruginosa* gene expression by host microflora through interspecies communication. *Mol Microbiol* 2003, 50, 1477-1491.
3. Poole, K.; Neshat, S.; Krebs, K.; Heinrichs, D.E. Cloning and nucleotide sequence analysis of the ferripyoverdine receptor gene *fpvA* of *Pseudomonas aeruginosa*. *J Bacteriol* 1993, 175, 4597-4604.
4. Yan, R.; Hu, S.; Ma, N.; Song, P.; Liang, Q.; Zhang, H.; Li, Y.; Shen, L.; Duan, K.; Chen, L. Regulatory Effect of DNA Topoisomerase I on T3SS Activity, Antibiotic Susceptibility and Quorum-Sensing-Independent Pyocyanin Synthesis in *Pseudomonas aeruginosa*. *Int J Mol Sci* 2019, 20, 1116, doi:10.3390/ijms20051116.
5. Liang, H.; Li, L.; Kong, W.; Shen, L.; Duan, K. Identification of a novel regulator of the quorum-sensing systems in *Pseudomonas aeruginosa*. *FEMS Microbiol Lett* 2009, 293, 196-204.
6. Duan, K.; Surette, M.G. Environmental regulation of *Pseudomonas aeruginosa* PAO1 Las and Rhl quorum-sensing systems. *J Bacteriol* 2007, 189, 4827-4836, doi:10.1128/JB.00043-07.
